# Supplementary material
Source: PubMed Central journal article supplement (PMC5831691)
Supplement: NIHMS922747-supplement-1.pdf [file NIHMS922747-supplement-1.pdf]

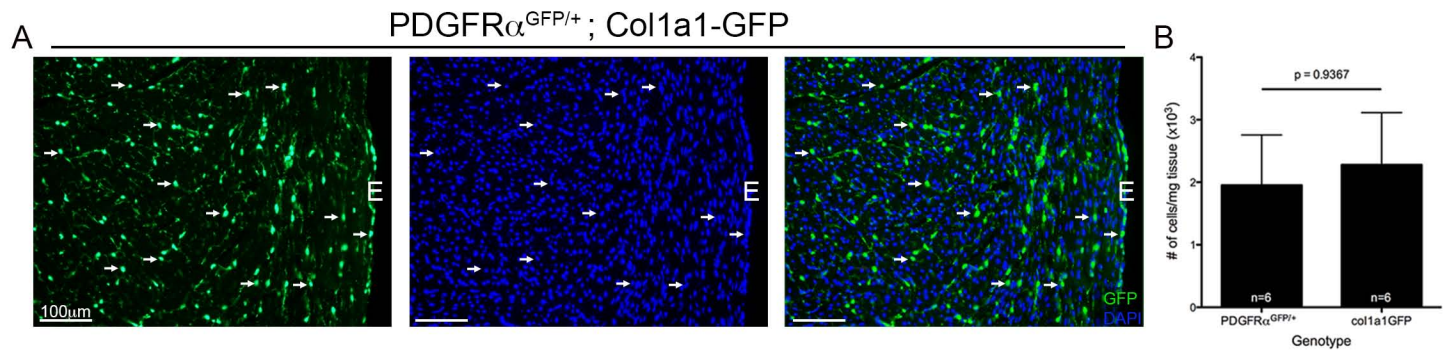

**Supplemental Figure 1. Comparison of GFP fibroblast reporter lines.** (A) Images of GFP expression from the left ventricle of  $PDGFR\alpha^{GFP/+}; Col1a1-GFP$  double transgenic hearts. Arrows indicate  $GFP^+$  nuclei ( $PDGFR\alpha^{GFP}$ ) that are embedded within cells expressing cytoplasmic GFP ( $Col1a1-GFP$ ). E: epicardium. Scale bars:  $100\mu m$ . (B) Number  $GFP^+$  cells determined by flow cytometry from either  $PDGFR\alpha^{GFP/+}$  or  $Col1a1-GFP$  hearts.  $n=6$  per genotype. Results are mean  $\pm$  SD.

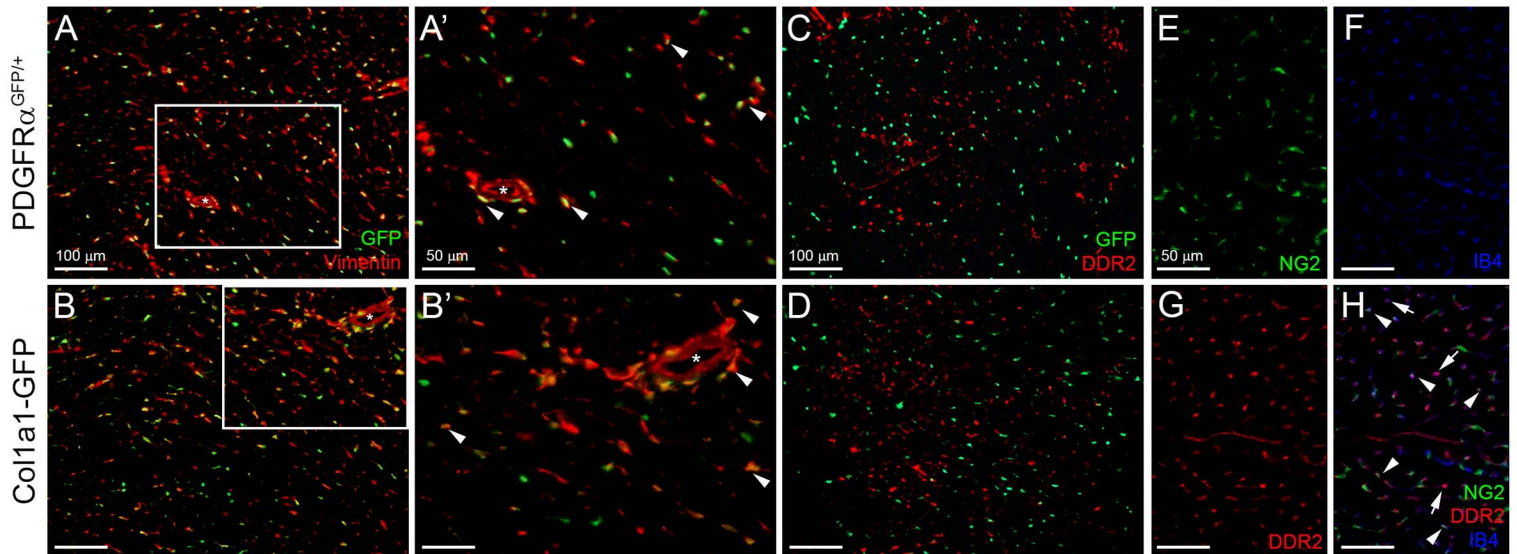

**Supplemental Figure 2. Alternative cardiac fibroblast markers. (A-B)** Representative images of vimentin (red) staining. **(A'-B')** Higher power view of images shown in A-B. Arrowheads indicate GFP<sup>+</sup> / vimentin<sup>+</sup> cells. **(C-D)** Representative images of DDR2 (red) staining. **(E-H)** Representative images of cardiac tissue stained with NG2 (green), IB4 (blue), and DDR2 (red). Asterisks indicate blood vessels. Arrowheads indicate DDR2<sup>+</sup>/NG2<sup>+</sup> cells. Arrows indicate DDR2<sup>+</sup>/IB4<sup>+</sup> cells. Scale bars: (A-D) 100 $\mu$ m, (A'-B') 50 $\mu$ m, and (E-H) 50 $\mu$ m.

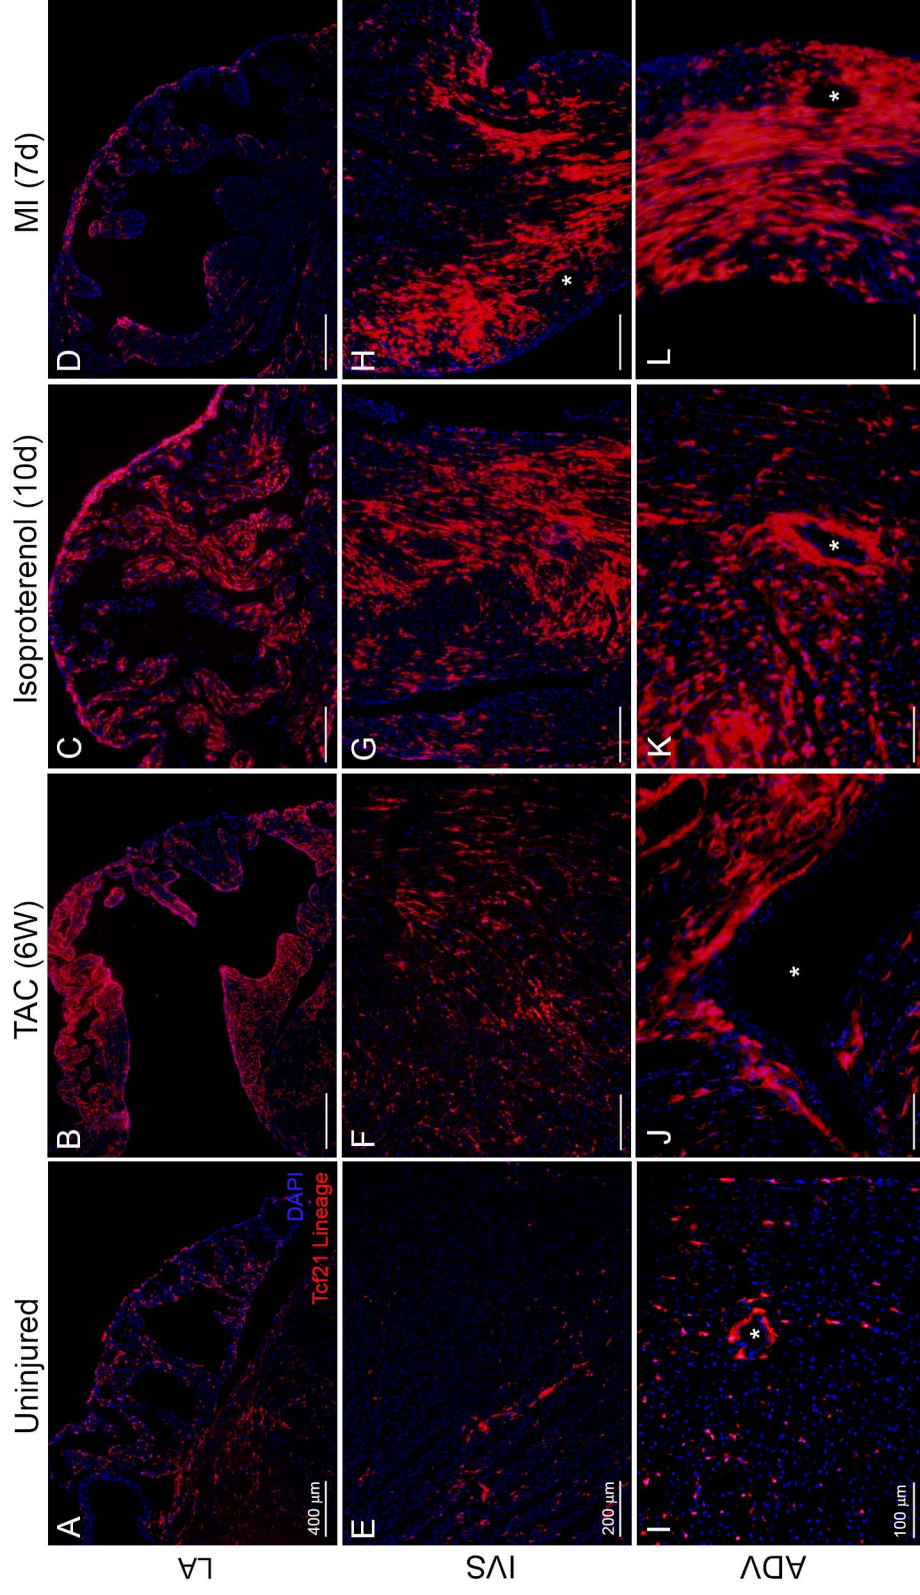

**Supplemental Figure 3. Atrial, septal, and adventitial fibroblast expansion in three injury models. (A-D) Atrial, (E-H) septal, and (I-L) adventitial fibroblasts after indicated treatments. Mode of tamoxifen induction: uninjured (gavage), TAC (chow), MI (gavage or postnatal intragastric injection), isoproterenol (gavage). Sections from TAC hearts were stained with DsRed antibody to detect tdTomato protein. Asterisk indicates blood vessel. LA: left atria; IVS: interventricular septum; ADV: adventitia. Scale bars: (A-D) 400μm, (E-H) 200μm, and (I-L) 100μm.**

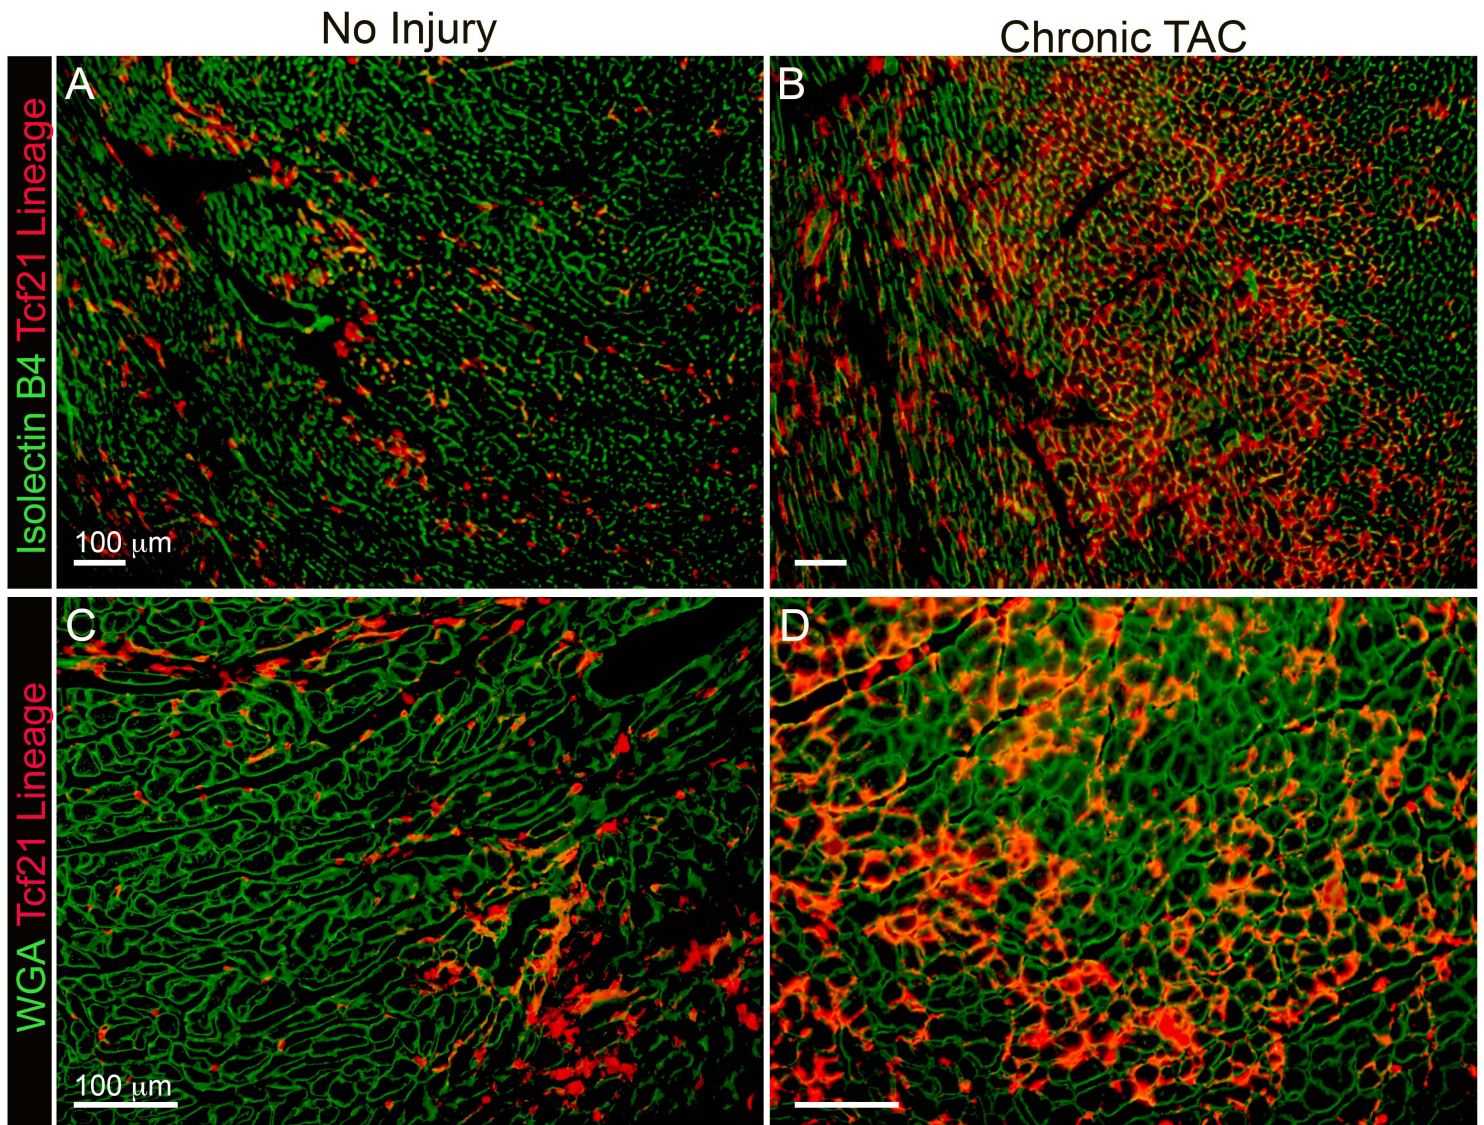

**Supplemental Figure 4. Fibroblast distribution in aged and chronic pressure overload heart.** Tcf21 lineage fibroblast accumulation in (A, C) One year old uninjured heart and (B, D) 1 year old heart after 7 months of mild pressure overload. (A-B) Isolectin B4 (green) and (C-D) WGA (green) staining. Fibroblasts accumulate in a perivascular and perimysial pattern predominantly after chronic pressure overload. Fibroblasts: tdTomato (red). WGA: wheat germ agglutinin. Scale bars: 100μm.

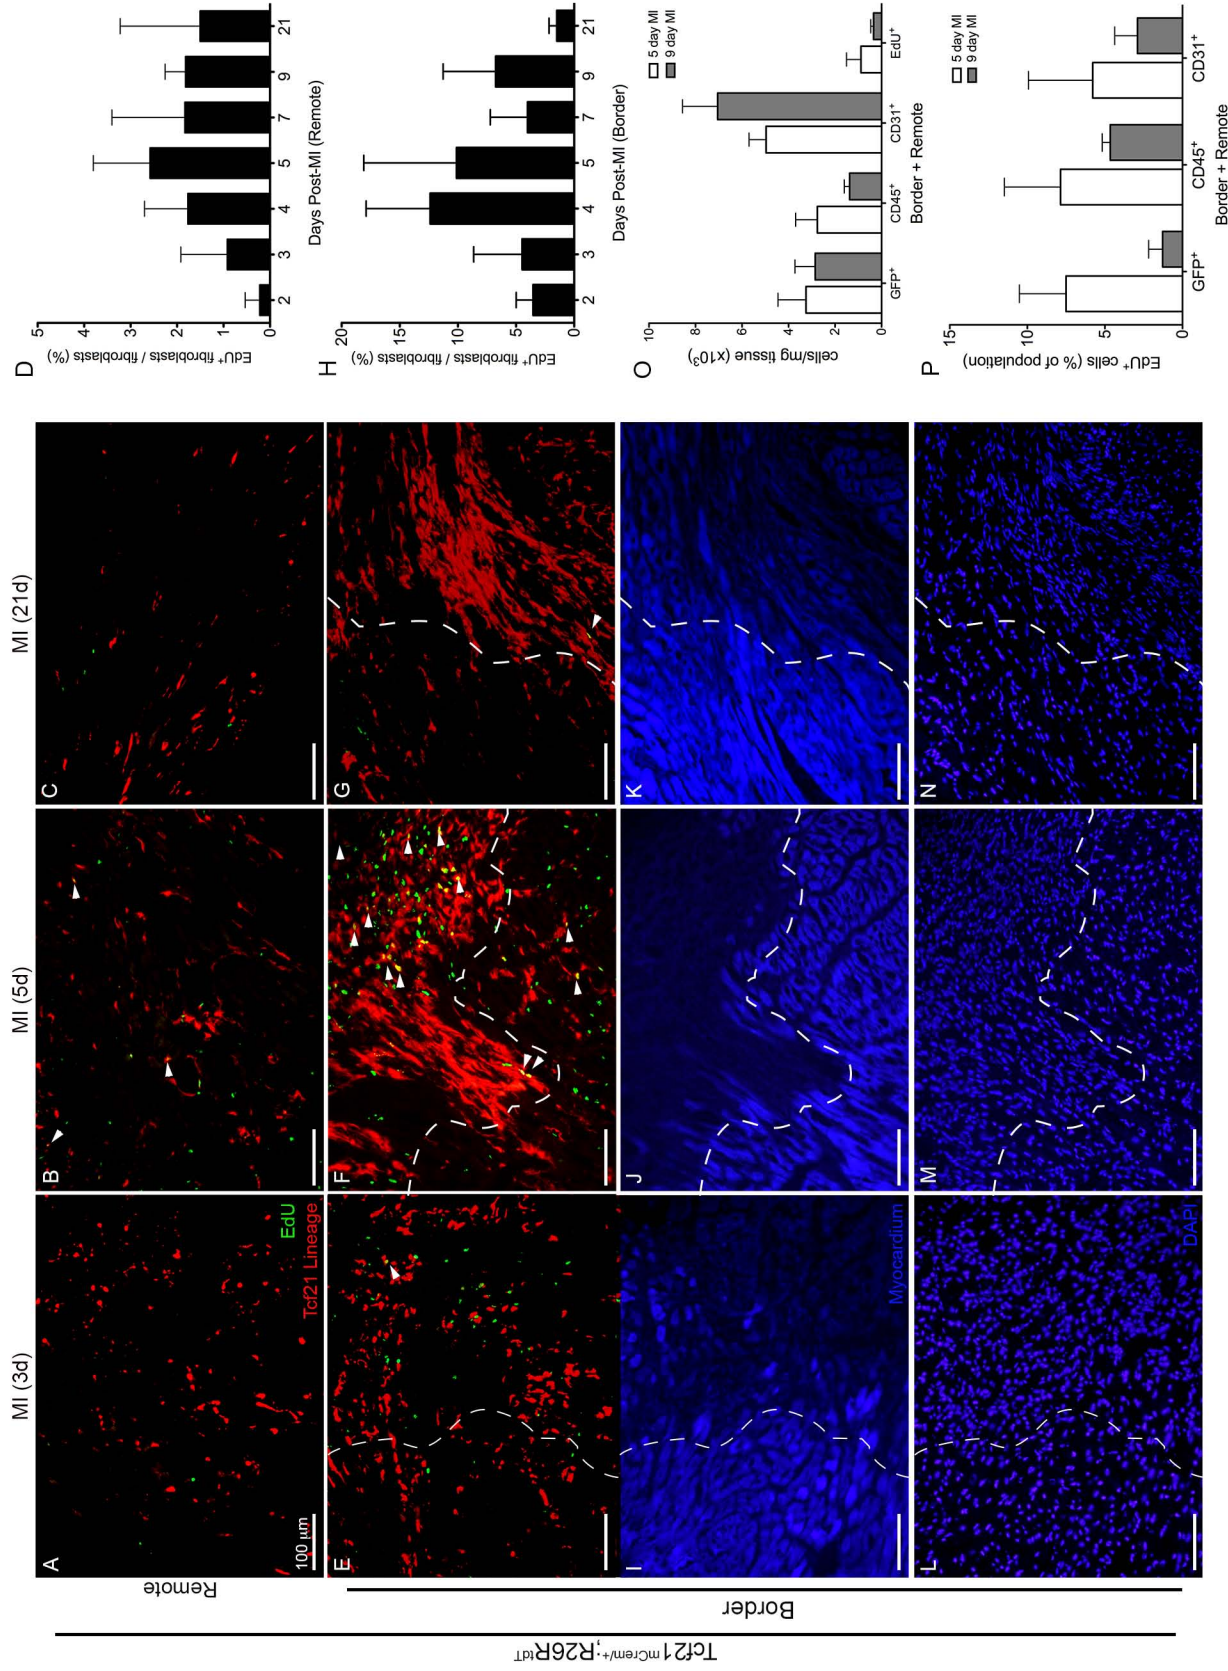

**Supplemental Figure 5. Border and remote area proliferation after MI.** (A-C) Remote and (E-G) border zone Tcf21 lineage fibroblasts after permanent LAD ligation. Fibroblasts: tdTomato (red); proliferating cell: EdU (green); myocardium: autofluorescence (blue, I-K), nuclei: DAPI (blue, L-N). (D, H) Proliferation analyzed by immunohistochemistry. (O) Number of cells per mg of tissue and the (P) percent of proliferating cells of the fibroblast (Col1a1-GFP<sup>+</sup>), immune cell (CD45<sup>+</sup>) and endothelial cell (CD31<sup>+</sup>) populations in the border and remote regions determined by flow cytometry. Results are mean ± SD. n=2-5 mice per group. Scale bars: 100µm.

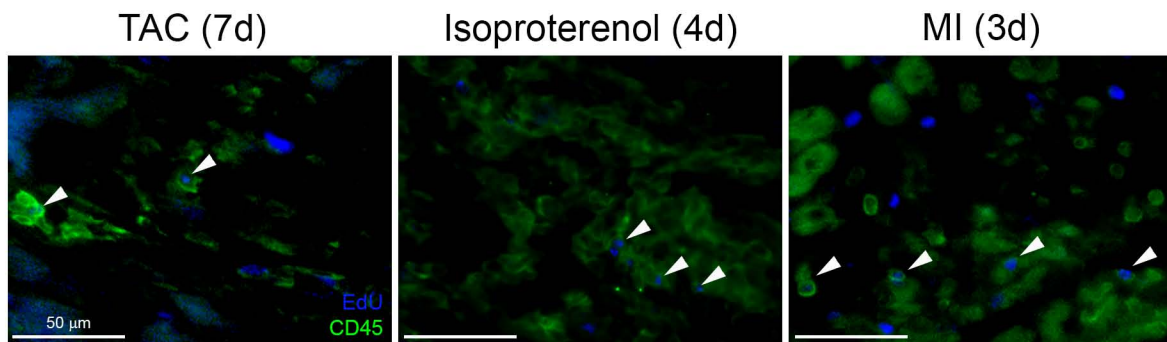

**Supplemental Figure 6. Immune cell proliferation after injury.** Representative images of CD45 (green) and EdU (blue) staining at indicated time points. Arrowheads identify CD45<sup>+</sup>/EdU<sup>+</sup> costained cells. Scale bars: 50μm.
