# Supplementary material
Source: PubMed Central journal article supplement (PMC5831691)
Supplement: NIHMS922747-supplement-2.pdf [file NIHMS922747-supplement-2.pdf]

**Supplemental Table 1. Antibodies used for cell or tissue staining.**

| <b>Antibody/reagent</b>                 | <b>Clone</b>      | <b>Application<br/>(Conc. µg/ml)</b> | <b>Supplier (catalog number)</b>                     |
|-----------------------------------------|-------------------|--------------------------------------|------------------------------------------------------|
| CD31                                    | 390               | FC (4.0)                             | Thermofisher (A14715)                                |
| CD45                                    | 30-F11<br>REA737  | FC (3.0)<br>TS (3.0)                 | Miltenyi (130-105-463)<br>Miltenyi (130-110-795)     |
| MEFSK4                                  | MEFSK4            | FC (1.5)                             | Miltenyi Biotec (130-102-302, 130-102-352)           |
| Sca-1                                   | REA422            | FC (3.0)                             | Miltenyi Biotec (130-106-427)                        |
| CD44                                    | REA664            | FC (3.0)                             | Miltenyi Biotec (130-110-117)                        |
| CD166                                   | REA370            | FC (3.0)                             | Miltenyi Biotec (130-105-487)                        |
| CD146                                   | ME-9F1            | FC (3.0)                             | Miltenyi Biotec (130-102-846)                        |
| αSMA                                    | 1A4               | FC (4.0) TS (2.0)<br>TS (2.5)        | eBioscience (41-9760-80)<br>eBioscience (53-9760-80) |
| Wheat germ agglutinin                   | NA                | TS (5.0)                             | Vector Labs (B-1025)                                 |
| Isolectin B4                            | NA                | TS (5.0)                             | Vector Labs (B-1205)                                 |
| NG2                                     | Rabbit polyclonal | TS (1:100)                           | Dr. William Stallcup                                 |
| Vimentin                                | NA                | TS (9.0)                             | Abcam (ab45939)                                      |
| DDR2                                    | N-20              | TS (2.0)                             | Santa Cruz (sc7555)                                  |
| DsRed                                   | Rabbit polyclonal | TS (1:100)                           | Clontech (632496)                                    |
| FC: flow cytometry; TS: tissue staining |                   |                                      |                                                      |

**Supplemental Table 2. Time point comparison for percent of proliferating fibroblasts after transverse aortic constriction.**

|                                                 |    | Days of transverse aortic constriction (lesion) |     |    |    |
|-------------------------------------------------|----|-------------------------------------------------|-----|----|----|
|                                                 |    | 5                                               | 7   | 14 | 21 |
| Days of transverse aortic constriction (lesion) | 7  | ns                                              |     |    |    |
|                                                 | 14 | *                                               | *** |    |    |
|                                                 | 21 | ***                                             | *** | ns |    |
|                                                 | 42 | **                                              | *** | ns | ns |

P-value determined by one-way ANOVA with Tukey Test for multiple comparisons. ns: not significant ( $p \geq 0.05$ ), \*:  $p \leq 0.05$ , \*\*:  $p \leq 0.01$ , \*\*\*:  $p \leq 0.001$ .

**Supplemental Table 3. Time point comparison for percent of proliferating fibroblasts after isoproterenol treatment.**

|                                 |    | Days of isoproterenol injection |    |    |     |    |
|---------------------------------|----|---------------------------------|----|----|-----|----|
|                                 |    | Saline                          | 2  | 4  | 7   | 10 |
| Days of isoproterenol injection | 2  | ns                              |    |    |     |    |
|                                 | 4  | ns                              | ns |    |     |    |
|                                 | 7  | **                              | *  | ns |     |    |
|                                 | 10 | ns                              | ns | ns | **  |    |
|                                 | 14 | ns                              | ns | ns | *** | ns |

P-value determined by one-way ANOVA with Tukey Test for multiple comparisons. ns: not significant ( $p \geq 0.05$ ), \*:  $p \leq 0.05$ , \*\*:  $p \leq 0.01$ , \*\*\*:  $p \leq 0.001$ .

**Supplemental Table 4. Time point comparison for percent of proliferating fibroblasts after myocardial infarction.**

|                                  |    | Days after myocardial infarction |     |     |     |     |     |     |    |
|----------------------------------|----|----------------------------------|-----|-----|-----|-----|-----|-----|----|
|                                  |    | Sham                             | 1   | 2   | 3   | 4   | 5   | 7   | 9  |
| Days after myocardial infarction | 1  | ns                               |     |     |     |     |     |     |    |
|                                  | 2  | ns                               | ns  |     |     |     |     |     |    |
|                                  | 3  | **                               | **  | ns  |     |     |     |     |    |
|                                  | 4  | ***                              | *** | *** | ns  |     |     |     |    |
|                                  | 5  | ***                              | *** | *** | *   | ns  |     |     |    |
|                                  | 7  | **                               | **  | ns  | ns  | *   | **  |     |    |
|                                  | 9  | ns                               | ns  | ns  | *   | *** | *** | **  |    |
|                                  | 21 | ns                               | ns  | ns  | *** | *** | *** | *** | ns |

P-value determined by one-way ANOVA with Tukey Test for multiple comparisons. ns: not significant ( $p \geq 0.05$ ), \*:  $p \leq 0.05$ , \*\*:  $p \leq 0.01$ , \*\*\*:  $p \leq 0.001$ .
